# Supplementary material
Source: publisher figshare collection journal article supplement (https://sage.figshare.com/ndownloader/files/15289961)
Supplement: Supplementary file 1 [file 15289961]

**Appendix 1:****List of Nomenclature for Diagnostic Codes that were programmed into Child Protection Alert System (CPAS) Highlighting Difficulty of Selection**

| <b>Diagnosis Entry (Description)</b>                                             | <b>Code Type</b> |
|----------------------------------------------------------------------------------|------------------|
| <b><i>Adult Specific Neglect Diagnoses</i></b>                                   |                  |
| Suspected elder neglect                                                          | IMO              |
| Adult neglect or abandonment, suspected, subsequent encounter                    | ICD-10-CM        |
| Adult neglect or abandonment, suspected, sequela                                 | ICD-10-CM        |
| Adult neglect or abandonment, suspected, initial encounter                       | ICD-10-CM        |
| Adult neglect or abandonment, suspected                                          | ICD-10-CM        |
| Adult neglect or abandonment, confirmed, subsequent encounter                    | ICD-10-CM        |
| Adult neglect or abandonment, confirmed, sequela                                 | ICD-10-CM        |
| Adult neglect or abandonment, confirmed, initial encounter                       | ICD-10-CM        |
| Adult neglect or abandonment, confirmed                                          | ICD-10-CM        |
| <b><i>Adult Specific Physical Diagnoses</i></b>                                  |                  |
| Unspecified adult maltreatment, suspected, subsequent encounter                  | ICD-10-CM        |
| Unspecified adult maltreatment, suspected, sequela                               | ICD-10-CM        |
| Unspecified adult maltreatment, suspected, initial encounter                     | ICD-10-CM        |
| Unspecified adult maltreatment, suspected                                        | ICD-10-CM        |
| Unspecified adult maltreatment, confirmed, subsequent encounter                  | ICD-10-CM        |
| Unspecified adult maltreatment, confirmed, sequela                               | ICD-10-CM        |
| Unspecified adult maltreatment, confirmed, initial encounter                     | ICD-10-CM        |
| Unspecified adult maltreatment, confirmed                                        | ICD-10-CM        |
| Suspected spouse abuse                                                           | IMO              |
| Suspected elder abuse                                                            | IMO              |
| Observation of suspected wife battering victim                                   | IMO              |
| Battered husband                                                                 | SNOMED CT        |
| Adult victim of physical abuse by male partner                                   | SNOMED CT        |
| Adult physical abuse, suspected, subsequent encounter                            | ICD-10-CM        |
| Adult physical abuse, suspected, sequela                                         | ICD-10-CM        |
| Adult physical abuse, suspected, initial encounter                               | ICD-10-CM        |
| Adult physical abuse, suspected                                                  | ICD-10-CM        |
| Adult physical abuse, confirmed, subsequent encounter                            | ICD-10-CM        |
| Adult physical abuse, confirmed, sequela                                         | ICD-10-CM        |
| Adult physical abuse, confirmed, initial encounter                               | ICD-10-CM        |
| Adult physical abuse, confirmed                                                  | ICD-10-CM        |
| Adult battering and other maltreatment by ex-spouse                              | IMO              |
| Encounter for examination and observation following alleged adult physical abuse | ICD-10-CM        |
| <b><i>Adult Specific Psychological Abuse Diagnoses</i></b>                       |                  |
| Adult psychological abuse, suspected, subsequent encounter                       | ICD-10-CM        |
| Adult psychological abuse, suspected, sequela                                    | ICD-10-CM        |
| Adult psychological abuse, suspected, initial encounter                          | ICD-10-CM        |
| Adult psychological abuse, suspected                                             | ICD-10-CM        |

|                                                                                             |           |
|---------------------------------------------------------------------------------------------|-----------|
| Adult psychological abuse, confirmed, subsequent encounter                                  | ICD-10-CM |
| Adult psychological abuse, confirmed, sequela                                               | ICD-10-CM |
| Adult psychological abuse, confirmed, initial encounter                                     | ICD-10-CM |
| Adult psychological abuse, confirmed                                                        | ICD-10-CM |
| <b><i>Adult Specific Sexual Abuse Diagnoses</i></b>                                         |           |
| Suspected adult sexual abuse                                                                | IMO       |
| Counseling for perpetrator of sexual abuse of adult other than partner                      | IMO       |
| Counseling for Perpetrator of Physical/Sexual Abuse                                         | ICD-9-CM  |
| Counseling for perpetrator of physical/sexual abuse                                         | IMO       |
| Adult sexual abuse, suspected, subsequent encounter                                         | ICD-10-CM |
| Adult sexual abuse, suspected, sequela                                                      | ICD-10-CM |
| Adult sexual abuse, suspected, initial encounter                                            | ICD-10-CM |
| Adult sexual abuse, suspected                                                               | ICD-10-CM |
| Adult sexual abuse, confirmed, subsequent encounter                                         | ICD-10-CM |
| Adult sexual abuse, confirmed, sequela                                                      | ICD-10-CM |
| Adult sexual abuse, confirmed, initial encounter                                            | ICD-10-CM |
| Adult sexual abuse, confirmed                                                               | ICD-10-CM |
| Abusive sexual relationship with wife                                                       | SNOMED CT |
| Abusive sexual relationship with partner                                                    | SNOMED CT |
| Abusive sexual relationship with husband                                                    | SNOMED CT |
| <b><i>Perpetrator Related Diagnoses</i></b>                                                 |           |
| Counseling for Perpetrator of Parental Child Abuse                                          | ICD-9-CM  |
| Counseling for perpetrator of parental child abuse                                          | IMO       |
| Counseling for perpetrator of physical abuse of adult other than partner                    | IMO       |
| Encounter for mental health services for perpetrator of non-parental child abuse            | ICD-10-CM |
| Encounter for mental health services for perpetrator of non-parental child abuse            | IMO       |
| Encounter for mental health services for perpetrator of other abuse                         | ICD-10-CM |
| Encounter for mental health services for perpetrator of parental child abuse                | ICD-10-CM |
| Encounter for mental health services for perpetrator of parental child abuse                | IMO       |
| Female partner as perpetrator of maltreatment and neglect                                   | IMO       |
| Female partner, perpetrator of maltreatment and neglect                                     | ICD-10-CM |
| Husband as perpetrator of maltreatment and neglect                                          | IMO       |
| Husband, perpetrator of maltreatment and neglect                                            | ICD-10-CM |
| Male friend of parent (co-residing in household) as perpetrator of maltreatment and neglect | IMO       |
| Male friend of parent (co-residing in household), perpetrator of maltreatment and neglect   | ICD-10-CM |
| Male partner as perpetrator of maltreatment and neglect                                     | IMO       |
| Male partner, perpetrator of maltreatment and neglect                                       | ICD-10-CM |
| Parental child abuse perpetrator counseling                                                 | IMO       |
| Perpetrator of adult abuse by ex-partner                                                    | IMO       |
| Perpetrator of adult abuse by ex-spouse                                                     | IMO       |
| Perpetrator of adult abuse by father, stepfather or boyfriend                               | IMO       |
| Perpetrator of adult abuse by spouse or partner                                             | IMO       |

|                                                                                  |           |
|----------------------------------------------------------------------------------|-----------|
| Perpetrator of physical/sexual abuse                                             | IMO       |
| Physical abuse of adult by person other than partner, counseling for perpetrator | IMO       |
| Physical or sexual abuse perpetrator counseling                                  | IMO       |
| Sexual abuse of adult by person other than partner, counseling for perpetrator   | IMO       |
| Visit for mental health services for perpetrator parental child abuse            | IMO       |
| Wife as perpetrator of maltreatment and neglect                                  | IMO       |
| Wife, perpetrator of maltreatment and neglect                                    | ICD-10-CM |
| Adoptive father as perpetrator of maltreatment and neglect                       | IMO       |
| Adoptive father, perpetrator of maltreatment and neglect                         | ICD-10-CM |
| Biological father as perpetrator of maltreatment and neglect                     | IMO       |
| Biological father, perpetrator of maltreatment and neglect                       | ICD-10-CM |
| Perpetrator of abuse by father, stepfather or boyfriend                          | IMO       |
| Perpetrator of child abuse by ex-partner                                         | IMO       |
| Perpetrator of child abuse by ex-spouse                                          | IMO       |
| Perpetrator of child abuse by father, stepfather or boyfriend                    | IMO       |
| Perpetrator of child abuse by spouse or partner                                  | IMO       |
| Perpetrator of child and adult abuse by father, stepfather or boyfriend          | IMO       |
| Perpetrator of Child and Adult Abuse by Father, Stepfather, or Boyfriend         | ICD-9-CM  |
| Perpetrator of Child and Adult Abuse by Spouse or Partner                        | ICD-9-CM  |
| Perpetrator of child and adult abuse by spouse or partner                        | IMO       |
| Perpetrator of parental child abuse                                              | IMO       |
| Stepfather as perpetrator of maltreatment and neglect                            | IMO       |
| Stepfather, perpetrator of maltreatment and neglect                              | ICD-10-CM |
| <b><i>Adult and Child Specific Physical Abuse and Neglect Diagnoses</i></b>      |           |
| Adult and child abuse, neglect and other maltreatment, confirmed                 | ICD-10-CM |
| Adult and child abuse, neglect and other maltreatment, suspected                 | ICD-10-CM |
| Child and adult battering and maltreatment by father or stepfather               | IMO       |
| Child and Adult Battering and Other Maltreatment by Spouse or Partner            | ICD-9-CM  |
| Observation for Abuse and Neglect                                                | ICD-9-CM  |
| Observation for alleged abuse and neglect                                        | IMO       |
| Observation for suspected abuse and neglect                                      | IMO       |
| <b><i>Adult and Children Specific Physical Abuse Diagnoses</i></b>               |           |
| Victim of trauma with multiple injuries                                          | SNOMED CT |
| Unspecified maltreatment, suspected                                              | ICD-10-CM |
| Unspecified maltreatment, confirmed                                              | ICD-10-CM |
| Physical abuse, suspected                                                        | ICD-10-CM |
| Physical abuse, confirmed                                                        | ICD-10-CM |
| Physical abuse, alleged                                                          | IMO       |
| Physical abuse                                                                   | IMO       |
| Observation Following Other Inflicted Injury                                     | ICD-9-CM  |
| Observation following other inflicted injury                                     | IMO       |
| Observation following criminal assault                                           | IMO       |
| Alleged physical abuse                                                           | IMO       |

|                                                                         |                                                               |           |
|-------------------------------------------------------------------------|---------------------------------------------------------------|-----------|
| <b><i>Adult and Children Specific Psychological Abuse Diagnoses</i></b> |                                                               |           |
|                                                                         | Alleged emotional abuse                                       | IMO       |
|                                                                         | Emotional abuse, alleged                                      | IMO       |
|                                                                         | Psychological abuse, confirmed                                | ICD-10-CM |
|                                                                         | Psychological abuse, suspected                                | ICD-10-CM |
|                                                                         | Victim of verbal abuse                                        | SNOMED CT |
| <b><i>Adult and Child Specific Sexual Abuse Diagnoses</i></b>           |                                                               |           |
|                                                                         | Sexual abuse, suspected                                       | ICD-10-CM |
|                                                                         | Sexual abuse, confirmed                                       | ICD-10-CM |
|                                                                         | Sexual abuse, alleged                                         | IMO       |
|                                                                         | Alleged sexual abuse                                          | IMO       |
| <b><i>Child Specific Neglect Diagnoses</i></b>                          |                                                               |           |
|                                                                         | Child neglect or abandonment, confirmed                       | ICD-10-CM |
|                                                                         | Child neglect or abandonment, confirmed, initial encounter    | ICD-10-CM |
|                                                                         | Child neglect or abandonment, confirmed, sequela              | ICD-10-CM |
|                                                                         | Child neglect or abandonment, confirmed, subsequent encounter | ICD-10-CM |
|                                                                         | Child neglect or abandonment, suspected                       | ICD-10-CM |
|                                                                         | Child neglect or abandonment, suspected, initial encounter    | ICD-10-CM |
|                                                                         | Child neglect or abandonment, suspected, sequela              | ICD-10-CM |
|                                                                         | Child neglect or abandonment, suspected, subsequent encounter | ICD-10-CM |
|                                                                         | Multiple deprivation of child                                 | SNOMED CT |
|                                                                         | Neglect or abandonment, confirmed                             | ICD-10-CM |
|                                                                         | Non-physical domestic abuse of child                          | IMO       |
|                                                                         | Suspected child neglect                                       | IMO       |
|                                                                         | Child neglect or abandonment, confirmed                       | ICD-10-CM |
| <b><i>Child Specific Physical Abuse Diagnoses</i></b>                   |                                                               |           |
|                                                                         | Child protection team following patient                       | IMO       |
|                                                                         | A/N care: H/O child abuse                                     | SNOMED CT |
|                                                                         | Abuse by father or stepfather                                 | IMO       |
|                                                                         | Abused child or adolescent                                    | IMO       |
|                                                                         | Battered baby                                                 | IMO       |
|                                                                         | Battered baby                                                 | SNOMED CT |
|                                                                         | Battered baby AND/OR child syndrome                           | SNOMED CT |
|                                                                         | Battered baby or child syndrome                               | IMO       |
|                                                                         | Battered baby syndrome                                        | IMO       |
|                                                                         | Battered child                                                | IMO       |
|                                                                         | Battered child syndrome                                       | IMO       |
|                                                                         | Child abuse                                                   | IMO       |
|                                                                         | Child abuse by another child                                  | IMO       |
|                                                                         | Child abuse by father                                         | IMO       |
|                                                                         | Child abuse by grandparent                                    | IMO       |
|                                                                         | Child abuse by mother                                         | IMO       |

|                                                                                  |           |
|----------------------------------------------------------------------------------|-----------|
| Child abuse by relative                                                          | IMO       |
| Child abuse by sibling                                                           | IMO       |
| Child abuse in family                                                            | SNOMED CT |
| Child abuse syndrome                                                             | IMO       |
| Child abuse, physical                                                            | IMO       |
| Child Abuse, Unspecified                                                         | ICD-9-CM  |
| Child abuse, unspecified                                                         | IMO       |
| Child battering and other maltreatment by ex-spouse                              | IMO       |
| Child Battering and Other Maltreatment by Father, Stepfather, or Boyfriend       | ICD-9-CM  |
| Child battering or other maltreatment by parent                                  | IMO       |
| Child maltreatment syndrome                                                      | IMO       |
| Child Physical Abuse                                                             | ICD-9-CM  |
| Child physical abuse                                                             | IMO       |
| Child physical abuse, confirmed                                                  | ICD-10-CM |
| Child physical abuse, confirmed, initial encounter                               | ICD-10-CM |
| Child physical abuse, confirmed, sequela                                         | ICD-10-CM |
| Child physical abuse, confirmed, subsequent encounter                            | ICD-10-CM |
| Child physical abuse, suspected                                                  | ICD-10-CM |
| Child physical abuse, suspected, initial encounter                               | ICD-10-CM |
| Child physical abuse, suspected, sequela                                         | ICD-10-CM |
| Child physical abuse, suspected, subsequent encounter                            | ICD-10-CM |
| Child previously physically abused                                               | IMO       |
| Child victim of maltreatment                                                     | SNOMED CT |
| Child victim of physical abuse                                                   | SNOMED CT |
| Childhood abuse                                                                  | IMO       |
| Confirmed child maltreatment                                                     | IMO       |
| Confirmed child physical abuse                                                   | IMO       |
| Encounter for examination and observation following alleged child physical abuse | ICD-10-CM |
| Encounter for mental health services for child abuse problems                    | ICD-10-CM |
| Encounter for mental health services for non-parental child abuse                | ICD-10-CM |
| Encounter for mental health services for parental child abuse                    | ICD-10-CM |
| Encounter for mental health services for victim of non-parental child abuse      | ICD-10-CM |
| Encounter for mental health services for victim of non-parental child abuse      | IMO       |
| Encounter for mental health services for victim of parental child abuse          | ICD-10-CM |
| Encounter for mental health services for victim of parental child abuse          | IMO       |
| Excessive corporal punishment of child                                           | IMO       |
| H/O abuse in childhood                                                           | IMO       |
| History of abuse in childhood                                                    | IMO       |
| Hx of abuse in childhood                                                         | IMO       |
| Late effect of child abuse                                                       | SNOMED CT |
| Neglect or abandonment, suspected                                                | ICD-10-CM |
| Non-accidental injury to child                                                   | IMO       |
| Non-accidental traumatic injury to child                                         | IMO       |

|                                                                      |           |
|----------------------------------------------------------------------|-----------|
| Observation of suspected child battering victim                      | IMO       |
| Parental concern about possible child abuse                          | IMO       |
| Physical abuse of adolescent                                         | IMO       |
| Physical abuse of child                                              | IMO       |
| Physical child abuse                                                 | IMO       |
| Physical child abuse                                                 | SNOMED CT |
| Physical child abuse, suspected                                      | IMO       |
| Shaken baby syndrome                                                 | SNOMED CT |
| Shaken infant syndrome                                               | ICD-10-CM |
| Shaken infant syndrome, initial encounter                            | ICD-10-CM |
| Shaken infant syndrome, sequela                                      | ICD-10-CM |
| Shaken infant syndrome, subsequent encounter                         | ICD-10-CM |
| Suspected child abuse                                                | IMO       |
| Suspected child abuse                                                | SNOMED CT |
| Suspected child maltreatment                                         | IMO       |
| Suspected child physical abuse                                       | IMO       |
| Suspected physical abuse of child                                    | IMO       |
| Unspecified child maltreatment, confirmed                            | ICD-10-CM |
| Unspecified child maltreatment, confirmed, initial encounter         | ICD-10-CM |
| Unspecified child maltreatment, confirmed, sequela                   | ICD-10-CM |
| Unspecified child maltreatment, confirmed, subsequent encounter      | ICD-10-CM |
| Unspecified child maltreatment, suspected                            | ICD-10-CM |
| Unspecified child maltreatment, suspected, initial encounter         | ICD-10-CM |
| Unspecified child maltreatment, suspected, sequela                   | ICD-10-CM |
| Unspecified child maltreatment, suspected, subsequent encounter      | ICD-10-CM |
| Victim of abuse, child                                               | IMO       |
| Victim of child abuse                                                | IMO       |
| Victim of child abuse                                                | SNOMED CT |
| Victim of excessive discipline                                       | SNOMED CT |
| Victim of harsh discipline                                           | SNOMED CT |
| Victim of infant/child abuse                                         | IMO       |
| Victim of violent environment                                        | SNOMED CT |
| Victim status, infant/child abuse                                    | IMO       |
| Visit for mental health services for victim non-parental child abuse | IMO       |
| Visit for mental health services for victim of parental child abuse  | IMO       |
| Counseling for Victim of Child Abuse                                 | ICD-9-CM  |
| Counseling for victim of child abuse                                 | IMO       |
| <b><i>Child Abuse and Neglect Specific Diagnoses</i></b>             |           |
| Child abuse/neglect victim counseling                                | IMO       |
| Child affected by Munchausen's by proxy                              | SNOMED CT |
| Other Child Abuse and Neglect                                        | ICD-9-CM  |
| Other child abuse and neglect                                        | IMO       |
| <b><i>Child Specific Psychological Abuse Diagnoses</i></b>           |           |

|                                                                       |           |
|-----------------------------------------------------------------------|-----------|
| Suspected child psychological abuse                                   | IMO       |
| On national service framework mental health register                  | SNOMED CT |
| Child: school psychology service                                      | SNOMED CT |
| Child victim of psychological or emotional abuse                      | SNOMED CT |
| Child psychological abuse, suspected, subsequent encounter            | ICD-10-CM |
| Child psychological abuse, suspected, sequela                         | ICD-10-CM |
| Child psychological abuse, suspected, initial encounter               | ICD-10-CM |
| Child psychological abuse, suspected                                  | ICD-10-CM |
| Child psychological abuse, confirmed, subsequent encounter            | ICD-10-CM |
| Child psychological abuse, confirmed, sequela                         | ICD-10-CM |
| Child psychological abuse, confirmed, initial encounter               | ICD-10-CM |
| Child psychological abuse, confirmed                                  | ICD-10-CM |
| Child Emotional/Psychological Abuse                                   | ICD-9-CM  |
| <b><i>Child Specific Sexual Abuse Diagnoses</i></b>                   |           |
| Alleged child sexual abuse                                            | IMO       |
| Child Sexual Abuse                                                    | ICD-9-CM  |
| Child sexual abuse victim counseling                                  | IMO       |
| Child sexual abuse, confirmed                                         | ICD-10-CM |
| Child sexual abuse, confirmed, initial encounter                      | ICD-10-CM |
| Child sexual abuse, confirmed, sequela                                | ICD-10-CM |
| Child sexual abuse, confirmed, subsequent encounter                   | ICD-10-CM |
| Child sexual abuse, suspected                                         | ICD-10-CM |
| Child sexual abuse, suspected, initial encounter                      | ICD-10-CM |
| Child sexual abuse, suspected, sequela                                | ICD-10-CM |
| Child sexual abuse, suspected, subsequent encounter                   | ICD-10-CM |
| Confirmed child sexual abuse                                          | IMO       |
| History of sexual abuse                                               | SNOMED CT |
| Parental concern about child sexual abuse                             | IMO       |
| Sexual child abuse, suspected                                         | IMO       |
| Suspected child sexual abuse                                          | IMO       |
| Suspicion of child sexual abuse                                       | IMO       |
| Victim of child molestation                                           | SNOMED CT |
| Victim of sexual abuse                                                | SNOMED CT |
| <b><i>Non-Abuse Specific Diagnoses</i></b>                            |           |
| Under care of psychiatrist for mental handicap                        | SNOMED CT |
| Seen by psychiatrist for mental handicap                              | SNOMED CT |
| Patient non-compliant - refused service                               | SNOMED CT |
| Observation for suspected concussion                                  | IMO       |
| Medically unfit for service                                           | SNOMED CT |
| Encounter for examination and observation for other specified reasons | ICD-10-CM |
| Child:community dental service                                        | SNOMED CT |
| Child: social services                                                | SNOMED CT |
| Removed - child abuse register                                        | SNOMED CT |

Abbreviations: International Classification of Disease (ICD-9), International Classification of Disease (ICD-10), Standardized Nomenclature of Medicine (SNOMED), Intelligent Medical Objects (IMO)
